# Supplementary material
Source: PubMed Central journal article supplement (PMC11318400)
Supplement: sj-pdf-1-jcb-10.1177_0271678X231224502.pdf [file sj-pdf-1-jcb-10.1177_0271678X231224502.pdf]

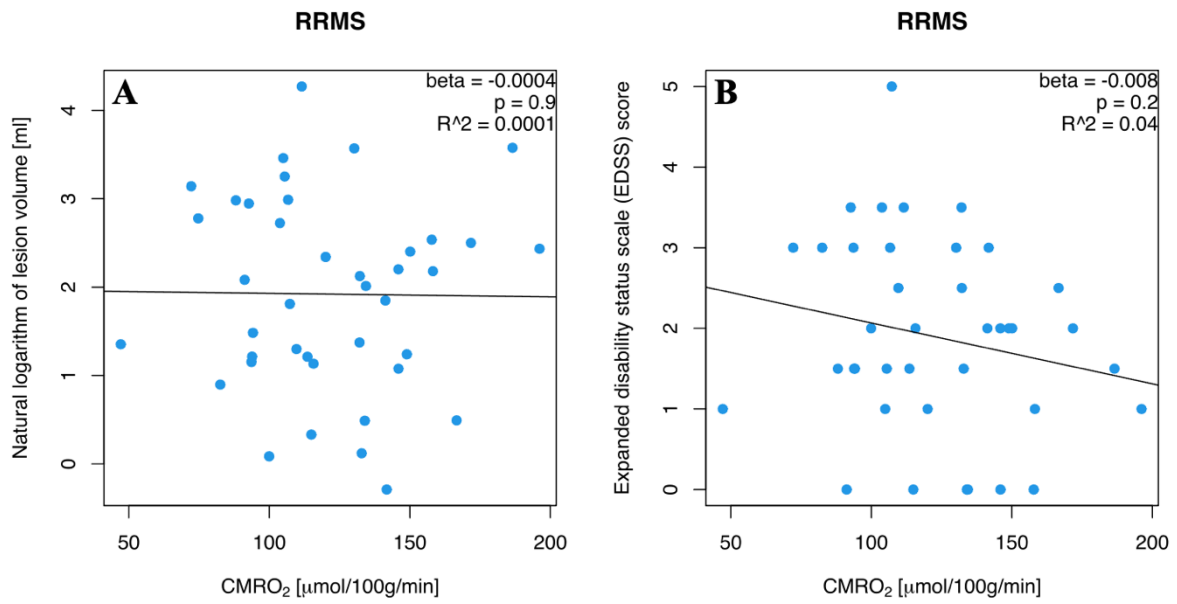

Supplementary Figure 1: CMRO<sub>2</sub> was not correlated with measures of disease severity. (A) Neither T2 lesions nor (B) Expanded disability status scale (EDSS) score correlated with the cerebral metabolic rate of oxygen consumption in multiple sclerosis patients. CMRO<sub>2</sub> = Cerebral metabolic rate of oxygen consumption, EDSS = Expanded disability status scale, RRMS = relapsing remitting multiple sclerosis patients.
